# Supplementary material for: Redirection of SKN-1 abates the negative metabolic outcomes of a perceived pathogen infection
Source: PubMed Central journal article supplement — Proc Natl Acad Sci U S A. 2019 Oct 14;116(44):22322–30. doi: 10.1073/pnas.1909666116 (PMC6825279; doi:10.1073/pnas.1909666116), 2019-10-14
Supplement: pnas.1909666116.sapp.pdf [file pnas.1909666116.sapp.pdf]

## **SUPPLEMENTARY INFORMATION:**

### **Supplemental Methods**

#### ***Additional C. elegans and bacterial strains used and culturing methods***

For experiments involving reproductive adults, progeny worms were separated from parents by washing adult worms daily onto new plates using M9 + 0.01% Triton X-100. For staging synchronous animals, hours post feeding (hpf) designates the time lapsed after starvation-mediated synchronized L1 larvae were placed onto food and allowed to grow. *E. coli* strain OP50 was used for all experiments unless otherwise stated. OP50 bacteria was cultured overnight at 37°C in LB + streptomycin and 250 µL of the culture was seeded on NGM plates the following day. Plates were allowed to dry, and bacteria allowed to grow on NGM plates for at least 2 days before use. For experiments using FUdR, 10 µL at a concentration of 100 mg/mL of the drug was dropped on regular NGM plates. Killed OP50 was attained by growing the bacteria in normal culture conditions for 12 hours and subsequently adding both kanamycin and ampicillin to the culture at 1:25 concentration and incubating while shaking for an additional 12 hours. The treated OP50 was then spun down and resuspended to 5X concentration with M9 and was exposed to 12500 µJ of UV and subsequently seeded on NGM plates and allowed to dry overnight.

#### ***Lifespan Experiment***

Synchronized L1-stage larval worms were dropped directly onto OP50 bacterial lawn and allowed to grow. Once worms reach adulthood, around 72 hours post feeding, they were transferred daily to a fresh plate using a platinum wire to separate parental worms from progeny. Transferring was done until no more progeny were observed on the plate. Scoring for dead worms was done by gentle prodding with a platinum wire, and worms were considered dead either when they were unresponsive to touch or internal progeny hatching occurred. Each genotype was assayed in biological triplicate using >50 animals in each independent lifespan experiment. Animals that crawled off the plate were censored.

#### ***Cold stress assay***

Age-synchronized worms, either at 48 or 144 hours post feeding, were placed at 2°C for 48 hours. Following cold exposure, worms were removed from 2°C and allowed to recover at room temperature for 1 hour. Worms were then scored for survival and were considered dead if they were unresponsive to a gentle prodding from a platinum tip wire.

#### ***Paraquat Exposure Experiment***

Paraquat (PQ) exposure was done by supplementing NGM plates with 75 µM paraquat. A 10 mM paraquat stock solution was made by dissolving paraquat (methyl viologen dichloride hydrate; Sigma Aldrich) in ddH<sub>2</sub>O, which can then be stored for several months at 4°C. 7.5 mL of 10 mM paraquat solution was added to 1 L of liquid NGM media at 55°C, and then plates were poured and seeded as normal with OP50. Synchronized L1 larval worms were dropped on to 75 µM paraquat treatment plates. Worms are washed daily to new treatment plates to separate parents from progeny, until the stated age. At that time point, they were collected and stained with ORO and scored for fat distribution.

#### ***Chromatin immunoprecipitation (ChIP)***

Synchronous populations of ~700,000 animals in triplicate were grown to day 2 of adulthood (120 hpf) on NGM plates or PQ treatment plates and treated with 1.1% formaldehyde to crosslink SKN-1 or SKN-1gf protein to chromatin. Worms were pelleted and flash frozen in FA Buffer

49 (WormBook). Samples were thawed and chromatin isolated by sonication in a Diagenode  
50 Bioruptor as previously described (1). SKN-1 or SKN-1gf bound to chromatin was  
51 immunoprecipitated and the associated DNA released by heating to 65°C overnight. Enrichment  
52 was assessed by qPCR of the promoter region of each gene in the ChIP DNA relative to the total  
53 starting material. All comparisons of enrichment at the promoter region were normalized to a  
54 qPCR of the 3'UTR region of the same gene.  
55

### 56 ***RNA interference (RNAi) Experiment***

57 OP50 RNAi strains were used for RNAi experiments (2). OP50 RNAi was grown overnight in LB  
58 + ampicillin and seeded the following day on NGM plates with IPTG and allowed to express  
59 dsRNA overnight. Synchronized L1 worms were dropped onto plates containing appropriate  
60 OP50 RNAi and cultured until stated age. Animals were then collected and used for experiments.  
61

### 62 **Nile Red Staining and Quantification**

63 A working Nile Red solution was made by diluting 6 µL of stock solution (0.5 mg/mL) in 1 mL 40%  
64 isopropanol and adding 10 µL of DAPI per samples being stained. Synchronized worms at the  
65 stated age were collected using 1 mL of 1X PBS + 0.01% Triton X-100 (PBST) into a  
66 microcentrifuge tube and allowed to gravity settle. Supernatant was aspirated and washed three  
67 additional times with 1 mL PBST. After the final wash, supernatant was removed until 100 µL was  
68 left and then 600 µL of 60% isopropanol was added, and samples were rocked for 3 minutes at  
69 room temperature. Samples were spun down at 25xg and supernatant was removed until 100 µL  
70 was left. Worms were then stained with 600 µL of Nile Red working solution and left in the dark  
71 for 2 hours. Following staining, 600 µL of the supernatant was removed, and the samples were  
72 de-stained with 600 µL of PBST for 30 minutes in the dark. Samples were placed on glass slides  
73 and images were taken using the green fluorescence channel of a Zeiss Axiocam MRm. The  
74 intensity of lipid droplets was quantified using ImageJ.  
75

### 76 ***RNA sequencing***

77 At least 1000 age synchronized day 2 adult worms were washed off plates in triplicate with 1.5  
78 mL of M9 buffer + 0.01% Triton X-100 (M9T) into a microcentrifuge tube and spun down at 1000xg  
79 The supernatant was removed, and the pellet was washed and spun down twice more to remove  
80 any residual bacteria from the sample. After the last wash, the supernatant was aspirated and  
81 500 µL of TRI reagent was added. The sample was then frozen at -80°C overnight.  
82 Subsequently, the sample was thawed and lysed using a syringe and needle. RNA extraction was  
83 then performed following Zymo Direct-zol RNA isolation kit protocol. RNA samples were  
84 sequenced and analyzed by Novogene.

85 **SUPPLEMENTARY FIGURES:**

86  
87 **Fig. S1. Categorization of fat levels for wild-type and *skn-1gf* worms.**

88 Representative images of lipid level distribution for ORO stained wild-type (A) and *skn-1gf* (B)  
89 worms, along with population of worms scored and proportion of population displaying each  
90 phenotype at 120 hours post feeding. At this time point, *skn-1gf* worms display a strong loss of  
91 somatic fat phenotype, while a majority of wild-type worms retain fat throughout their body. The  
92 criteria for lipid level categorization is described in the methods. All experiments were performed  
93 in a minimum of three biological replicates and lipid distribution was assessed in at least 300  
94 animals. Scale bar = 50µm.

95  
96 **Fig. S2. RNAi screen of chromatin modifiers effect on Asdf levels in *skn-1gf***

97 RNAi screen of *skn-1gf* worms done using OP50 RNAi clones. Chromatin modifiers associated  
98 with H3K4me3 complex, *wdr-5* and *rbbp-5*, suppressed the Asdf phenotype in *skn-1gf* worms.  
99 The RNAi screen was performed in biological triplicate and 50 worms were scored for each  
100 experiment. Two independent *wdr-5* RNAi clones tested positive. *set-2* RNAi animals were  
101 developmentally delayed and asynchronous at time of scoring.

102  
103 **Fig. S3. Loss of *wdr-5* suppresses pleiotropic phenotypes of *skn-1gf* animals**

104 (A) Representative images of lipid level distribution for ORO stained *wdr-5lf;skn-1gf* worms, along  
105 with population of worms scored and proportion of population displaying each phenotype at 120  
106 hours post feeding. Loss of *wdr-5* suppresses fat loss in *skn-1gf* worms. (B) *wdr-5lf* abolishes  
107 H3K4me3 chromatin marks. (C) *skn-1gf* worms have a shortened lifespan, which is partially  
108 rescued by loss of *wdr-5*. Graph shows the combination of three biological replicates of the  
109 lifespan assay with >50 worms in each replicate (after censoring – WT n=127; *skn-1gf* n=241;  
110 *wdr-5lf; skn-1gf* n=304). (D-E) *skn-1gf* mutants are resistant to oxidative stress early in adulthood  
111 (80hpf) (D) that is lost later in life (120hpf) (E). This increased sensitivity is abolished in the  
112 absence of WDR-5. (F-G) Worms at 48 hours post feeding display similar survival levels following  
113 cold stress assay except for *wdr-5lf;skn-1gf*, which has an increased survival percentage, possibly  
114 due to the slower growth rate of the double mutant and reflecting the younger developmental  
115 stage of the animal at the time of the assay (F). (G) At 144 hours post feeding, *skn-1gf* worms  
116 display a decreased survival to cold stress, which may be due to the loss of fat phenotype seen  
117 during this age. This decreased survival is suppressed by the *wdr-5lf(ok1417)* mutation. (H) *wdr-*  
118 *5lf(ok1417)* animals reach egg laying adulthood at a slower rate (less than 24 hours) than wild  
119 type animals. (I) *wdr-5lf;skn-1gf* display suppressed levels of Asdf. \*\*\*\*P<0.0001 Fisher's exact  
120 two-tailed test used to compare stress survival percentage and log-rank test for lifespan analysis.  
121 All experiments were performed in a minimum of three biological replicates and lipid distribution  
122 was assessed in at least 300 animals. Scale bar = 50µm.

123  
124 **Fig. S4. Comparison of transcript levels in *wdr-5lf;skn-1gf* relative to *skn-1gf* animals at**  
125 **120 hours post feeding using RNA-seq**

126 (A-B) RNA-seq analysis of *wdr-5lf;skn-1gf* worms reveals genes associated with innate immune  
127 responses (A) are downregulated in *wdr-5lf;skn-1gf* worms when compared to *skn-1gf* worms,  
128 but oxidative stress genes (B) remain at the same. This suggests that the pleiotropic  
129 consequences suppressed in the *wdr-5lf;skn-1gf* double mutant may be due to the suppression  
130 of innate immune response genes. (C) Model of the impact of loss of Histone H3 trimethylation  
131 evokes on the transcriptional activity of SKN-1 and physiological responses. \*\*P<0.01,  
132 \*\*\*P<0.001. \*\*\*\*P<0.0001

134 **Fig. S5. Representative images of fat level categorization for WT and *skn-1gf* worms**  
135 **treated with paraquat**

136 Representative images of lipid level distribution for ORO stained (A) wild-type and (B) *skn-1gf*  
137 worms treated with 75  $\mu$ M paraquat (PQ), along with the population of worms scored and  
138 proportion of population displaying each phenotype at 120 hours post feeding. Exposure to 75  
139  $\mu$ M of PQ results in a relatively unchanged lipid level distribution in wild-type worms, while *skn-*  
140 *1gf* worms show a suppression of the Asdf phenotype and an overall increase in lipid levels  
141 compared to untreated *skn-1gf* worms. (C-D) PQ treatment does not abolish OP50 bacteria  
142 growth. OP50 was inoculated in either LB (C) or LB + 75uM PQ (D) and grown overnight with  
143 shaking. Cultures were then diluted and 5 $\mu$ l plated on LB and allowed to grow to assess culture  
144 viability by colony count. All experiments were performed in a minimum of three biological  
145 replicates and lipid distribution was assessed in at least 200 animals. Scale bar = 50 $\mu$ m.  
146

147 **Fig. S6. Comparison of transcript levels in *skn-1gf* worms that were untreated or treated**  
148 **with paraquat at 120 hours post feeding.**

149 RNA-seq analysis of *skn-1gf* worms treated with paraquat (PQ) reveals that oxidative stress  
150 genes (A) remain unchanged or increased when compared to untreated *skn-1gf* worms. Read  
151 counts for genes associated with the innate immune response (B) are significantly lower in PQ-  
152 treated *skn-1gf* worms compared to untreated *skn-1gf* worms. This trend in gene expression  
153 remains consistent with *wdr-5lf;skn-1gf*, another suppressor of the Asdf phenotype in *skn-1gf*  
154 worms. (C) Depiction of overall change in transcriptional focus of SKN-1gf activity in response to  
155 oxidative stress. \* $P < 0.05$ , \*\* $P < 0.01$ , \*\*\*\* $P < 0.0001$   
156

157 **Fig. S7. *nsy-1gf* worms display a similar age-dependent fat loss as *skn-1gf* worms**

158 (A) Representative images of lipid level distribution for ORO stained *nsy-1gf* worms, along with  
159 the population of worms scored and the proportion of the population displaying each phenotype  
160 at 144 hours post feeding. Constitutive activation of *nsy-1*, a MAP3K involved in the innate  
161 immune pathway, causes worms to undergo a similar age-dependent depletion of lipids in somatic  
162 tissues at 144 hours post feeding. (B) This loss of fat at 144hpf is *skn-1* dependent as RNAi of  
163 *nsy-1gf* worms for *skn-1* seems to result in more non-Asdf worms when compared to L4440 RNAi.  
164 All experiments were performed in a minimum of three biological replicates and lipid distribution  
165 was assessed in at least 250 animals. \*\*\*\* $P < 0.0001$  Fisher's exact two-tailed test used to  
166 compare survival percentage. Scale bar = 50 $\mu$ m.  
167

168 **Fig. S8. Exposure to the pathogen *Pseudomonas aeruginosa* results in SKN-1 dependent**  
169 **fat loss and is attenuated by non-virulent strains.**

170 Representative images of the lipid level distribution for wild-type worms exposed for 4 hours to *P.*  
171 *aeruginosa* (A) and 2 other non-virulent mutants *gacA* (B), or *rhIR* (C). Worms were stained with  
172 ORO 72 hours post feeding. The population of worms scored and the percentage displaying each  
173 phenotype are provided. Wild-type worms exposed to pathogens exhibited a similar fat loss  
174 phenotype to that seen in *skn-1gf* and *nsy-1gf* worms. This phenotype is not observed in wild-  
175 type worms exposed to non-virulent mutant pathogens. (D-E) The loss of somatic lipids in  
176 response to *P. aeruginosa* exposure is attenuated in *vit-5* RNAi treated animals (D) and enhanced  
177 in SKN-1gf mutants (E). (F-G) RNAi of *skn-1* delays somatic fat loss in response to pathogen. At  
178 least two biological replicates were performed and a minimum of 100 animals were analyzed in  
179 each replicate. \* $P < 0.05$ , \*\*\*\* $P < 0.0001$  Fisher's exact two-tailed test used to compare non-Asdf  
180 to Asdf worms  
181

182 **Fig. S9. Adult animals are resistant to *P. aeruginosa* fast-killing.** Wild type (black), *skn-*  
183 *1gf(lax188)* mutants (red), *wdr-5lf(ok1417)* mutants (blue), or *wdr-5lf(ok1417);skn-1gf(lax188)*  
184 double mutants (green) were exposed to *Pseudomonas aeruginosa* “fast kill” as young adults  
185 (YA). As previously described, post-developmental animals are less sensitive to *P. aeruginosa*  
186 fast-kill exposure as compared to larval stage 4 (L4) animals.

187  
188 **Fig. S10. Metabolic phenotypes of SKN-1gf activity and subsequent redirection. (A-B)**  
189 Analysis of the mRNA reads of the indicated genes related to metabolism. **(C)** Representative  
190 images of Nile Red (NR) stained wildtype and *skn-1gf(lax188)* mutants reveals a 60% reduction  
191 in total lipids at day 2 of adulthood. See also tables S1 thru S4 for all RNA-seq measurements.  
192 \* $P < 0.05$ ; \*\*\* $P < 0.001$ ; \*\*\*\* $P < 0.0001$  by two-tailed t-test. Scale bar = 50 $\mu$ m.

193 **REFERENCES:**

194

195 1. Cecere G & Grishok A (2014) RNA Chromatin Immunoprecipitation (RNA-ChIP) in  
196 *Caenorhabditis elegans*. *Bio-protocol* 4(24):e1358.

197 2. Xiao R, *et al.* (2015) RNAi Interrogation of Dietary Modulation of Development,  
198 Metabolism, Behavior, and Aging in *C. elegans*. *Cell Rep* 11(7):1123-1133.

199

**A****non-Asdf**  
89.8%**intermediate**  
10.0%**Asdf**  
0.2%**wild-type**  
% of population  
n=873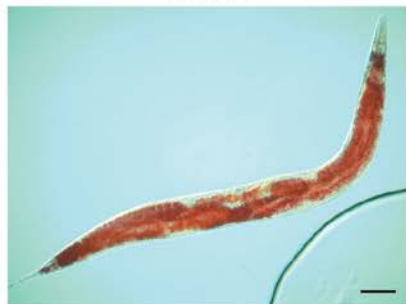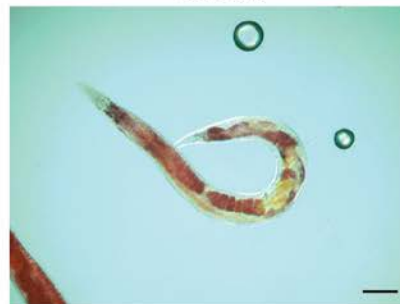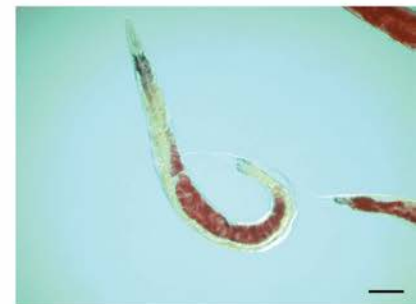**B****non-Asdf**  
2.1%**intermediate**  
6.2%**Asdf**  
91.7%***skn-1gf***  
% of population  
n=759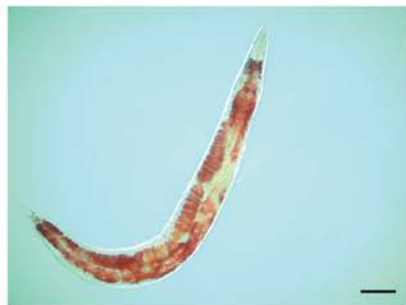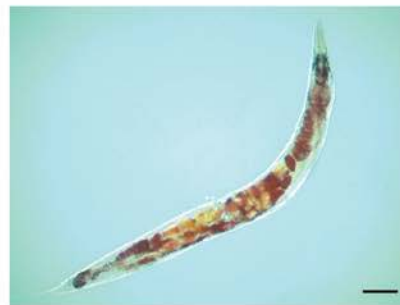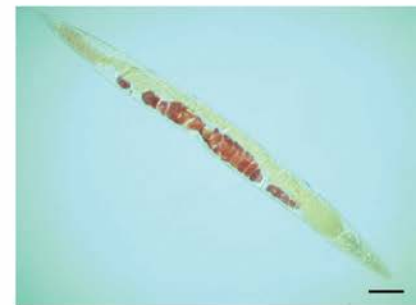**Figure S1**

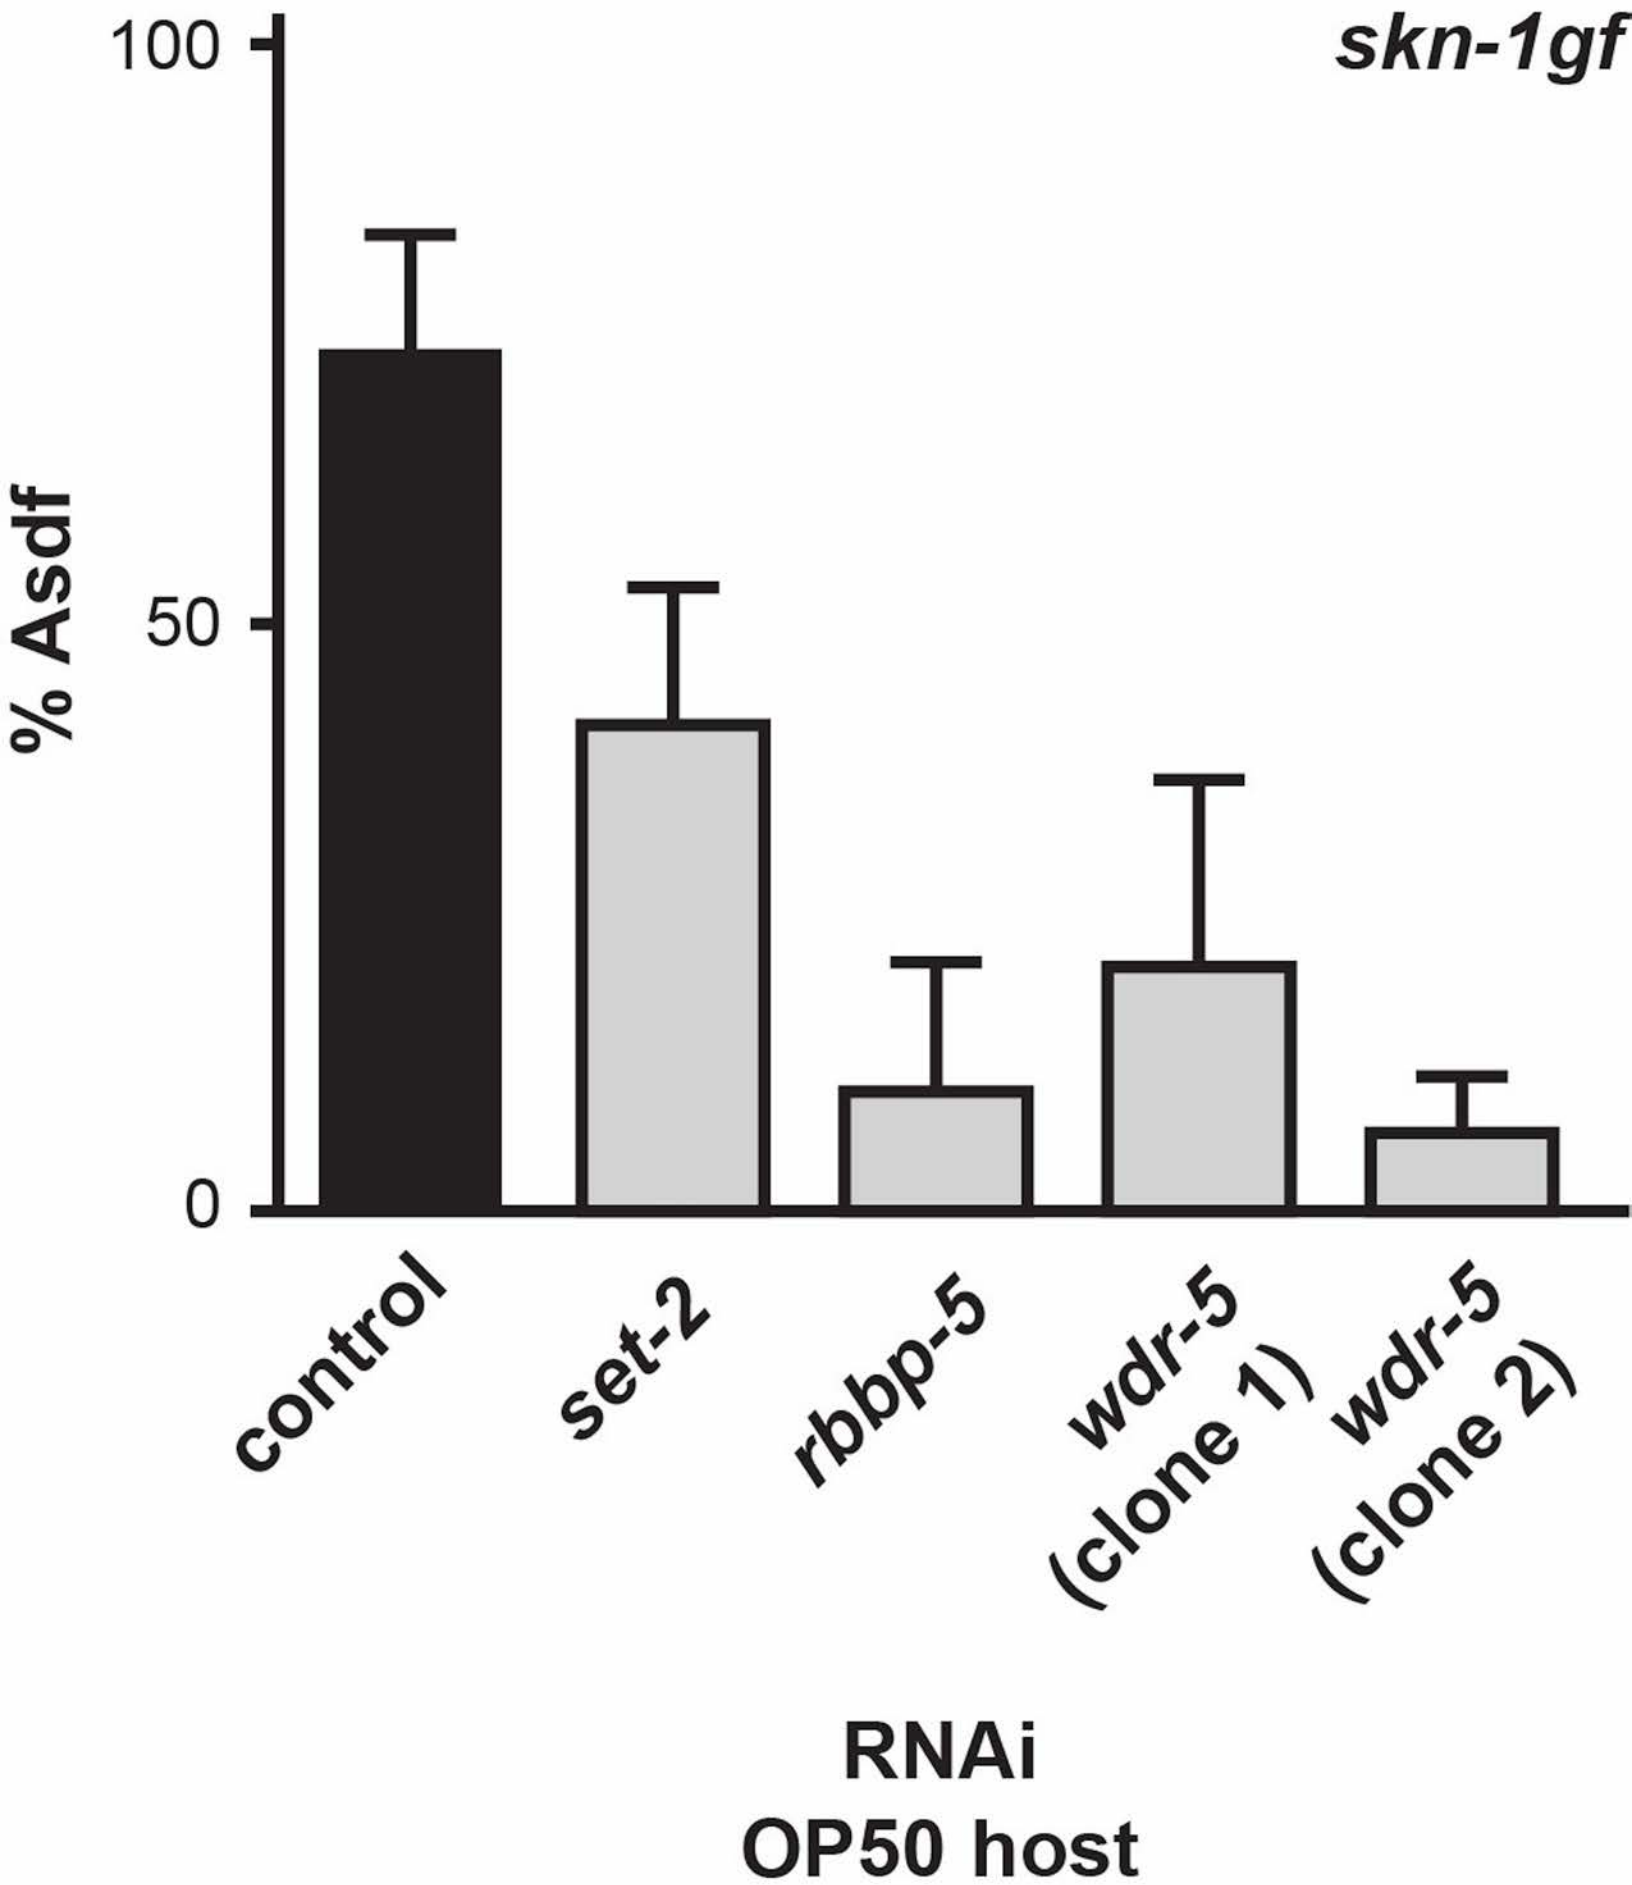**Figure S2**



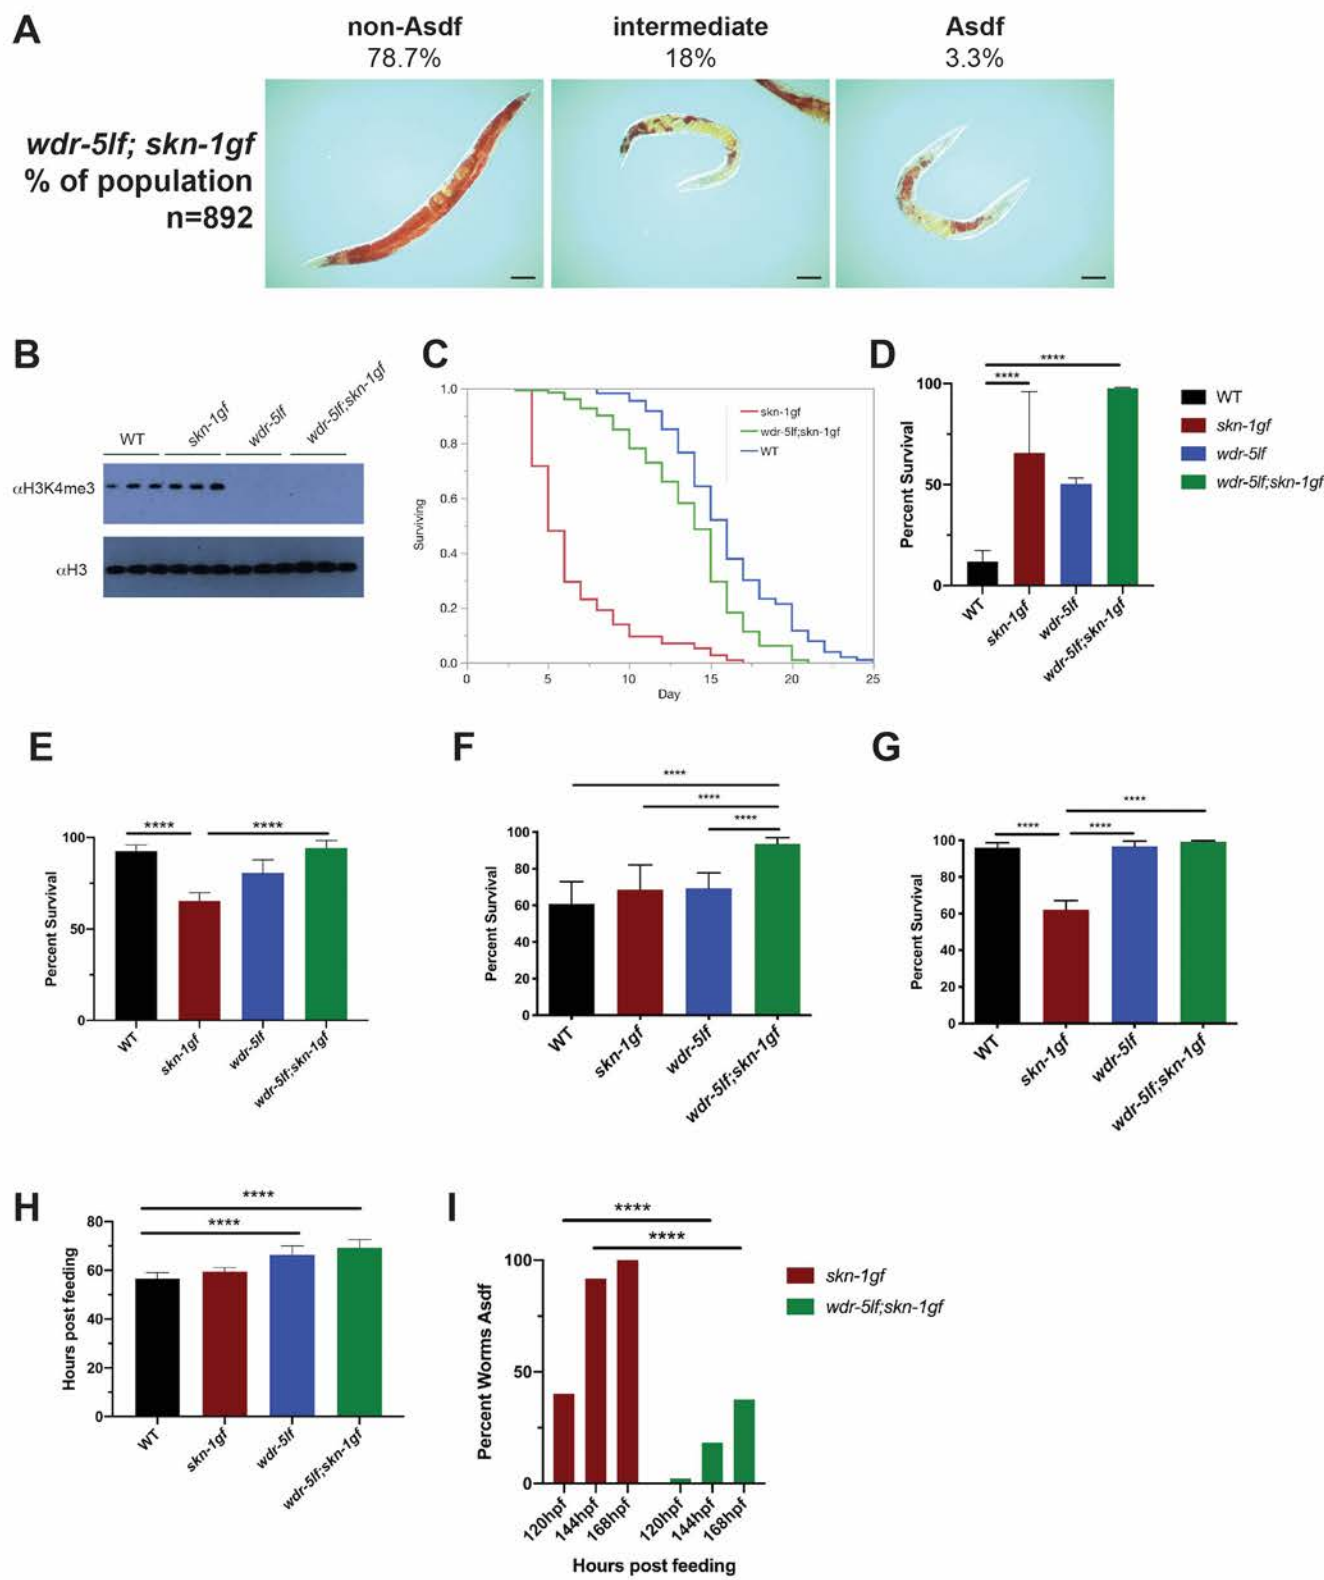

Figure S3

A

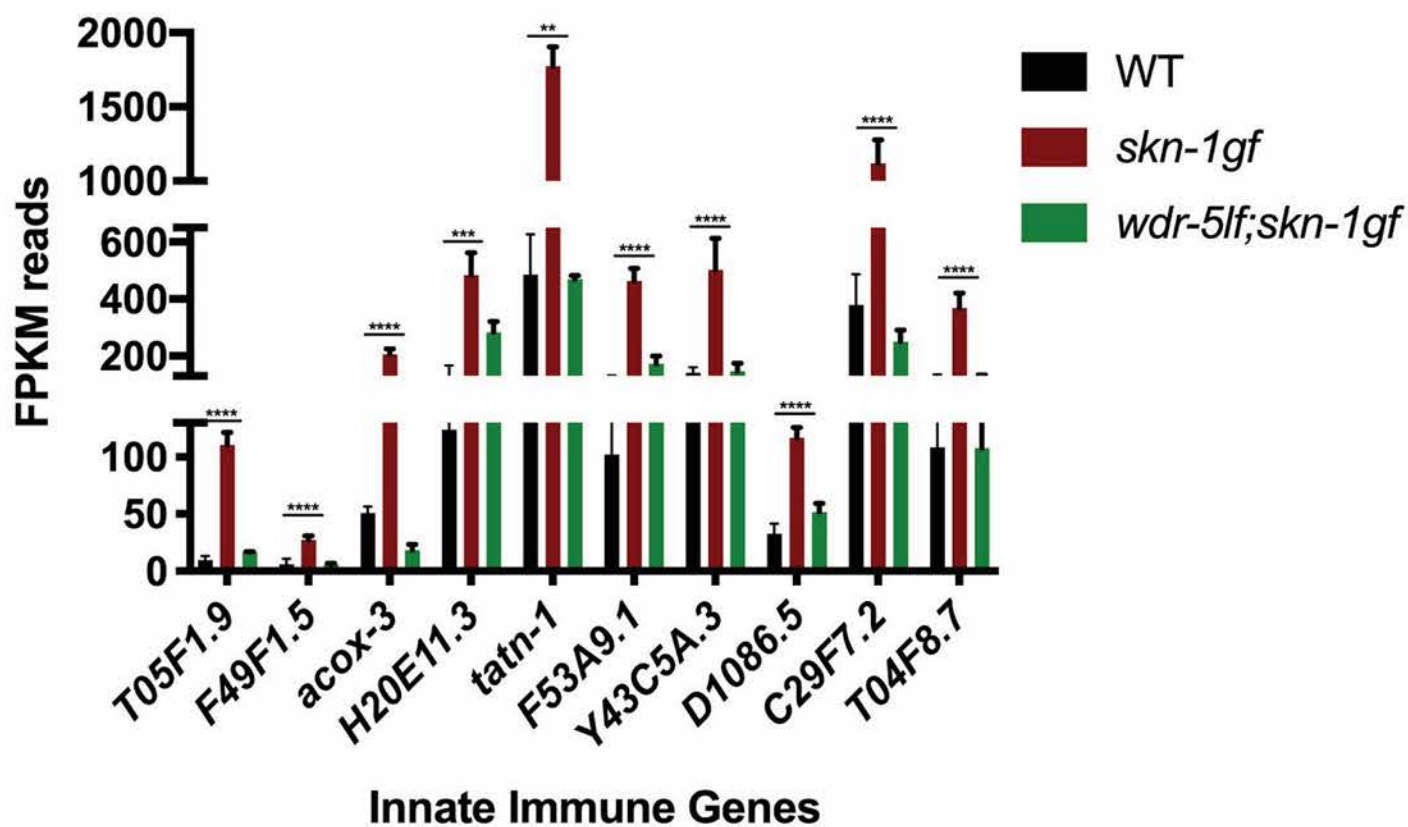

B

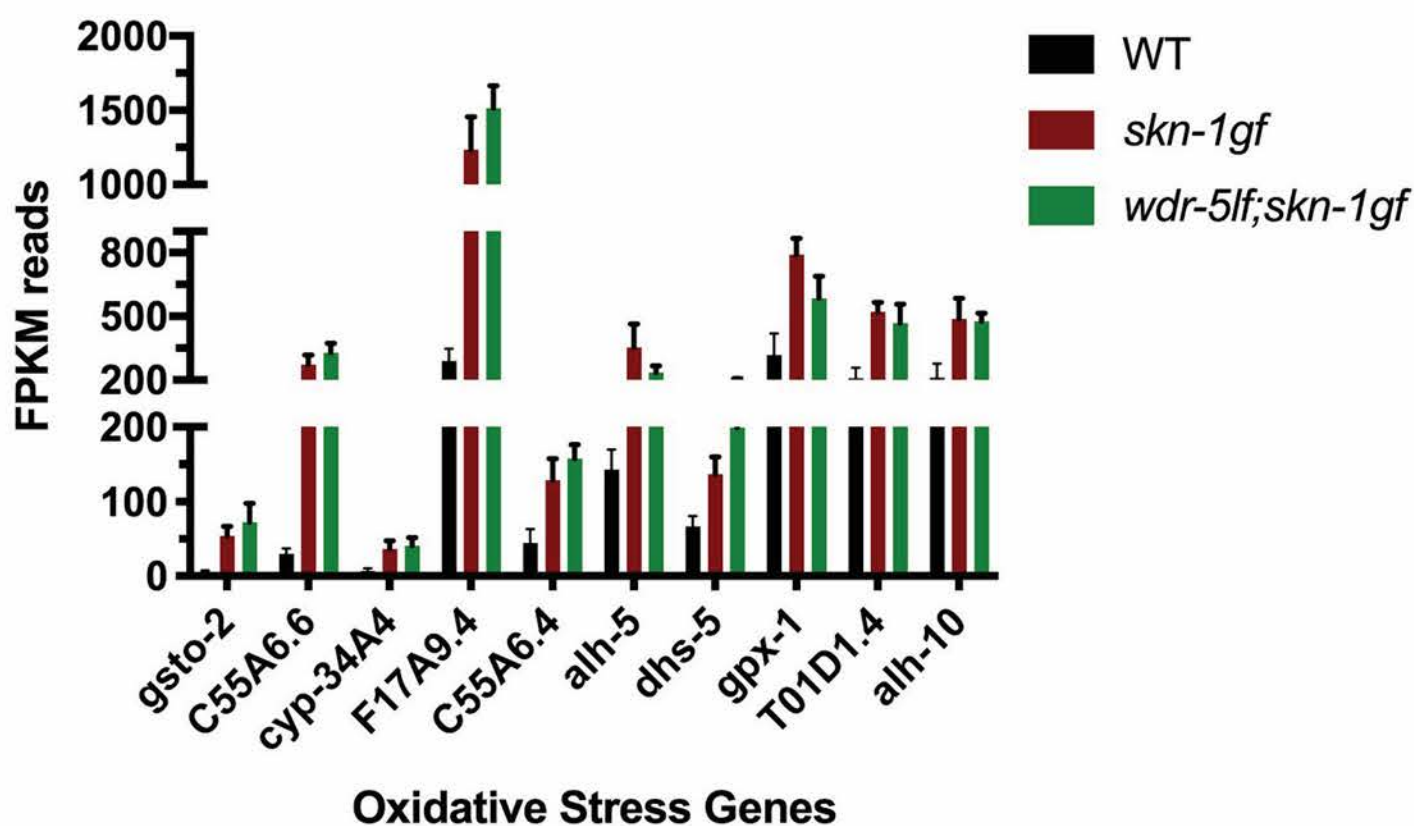

C

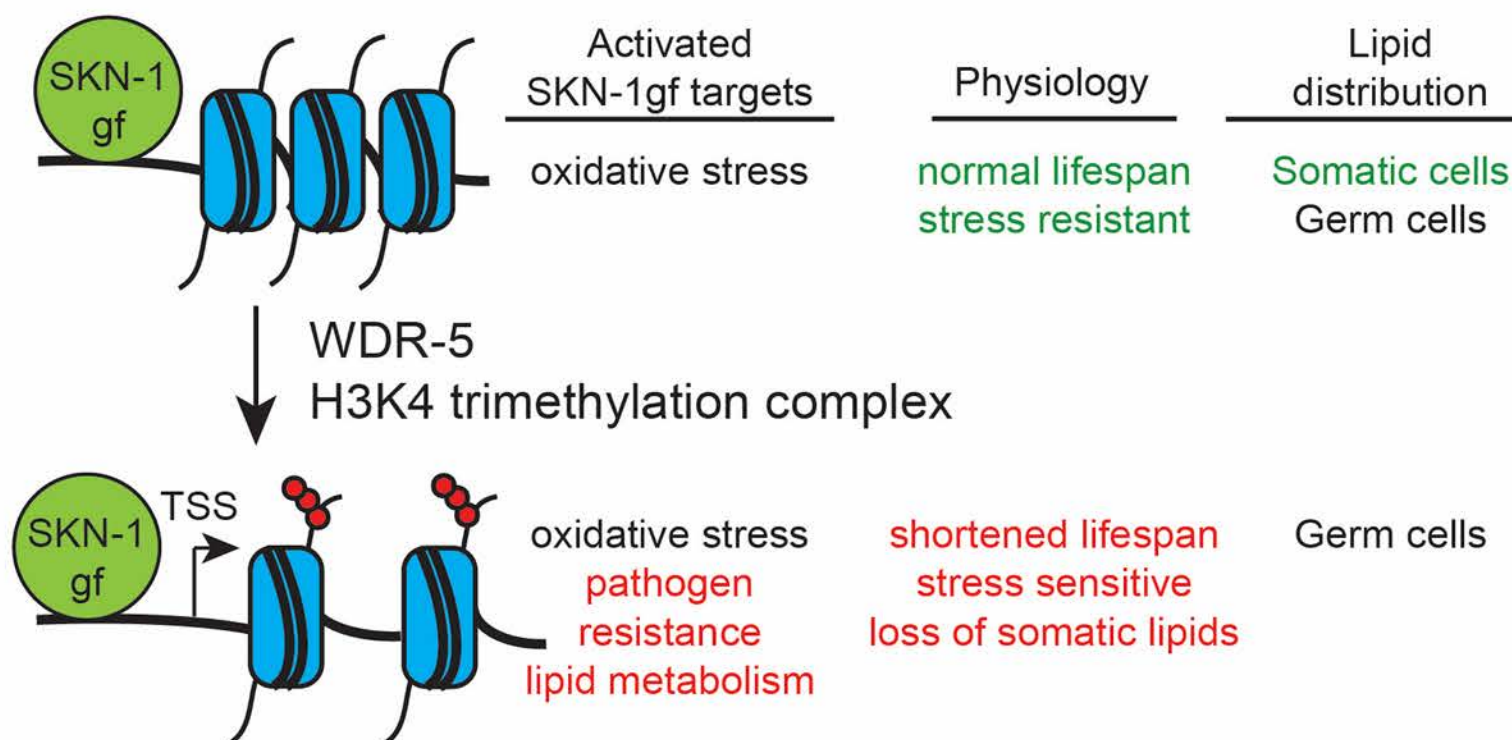

Figure S4

**A**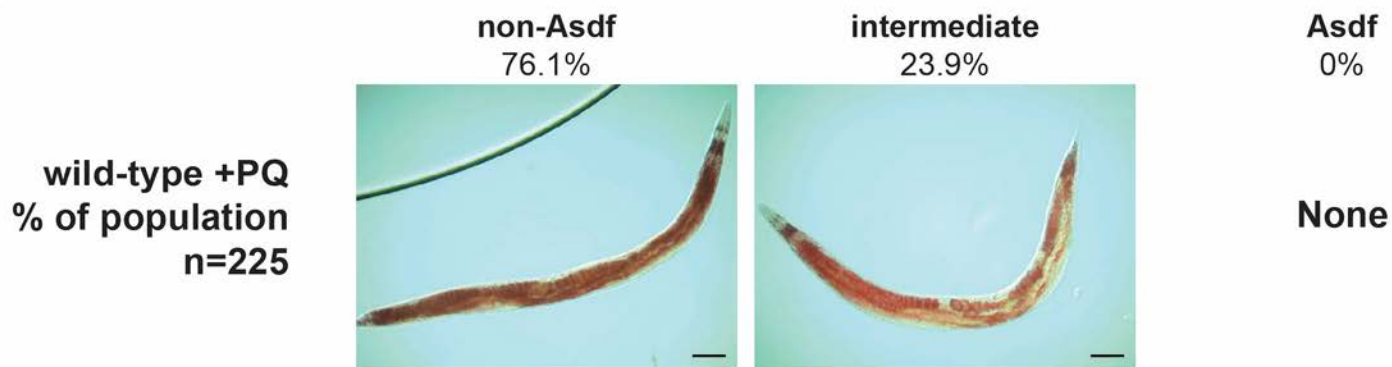**B**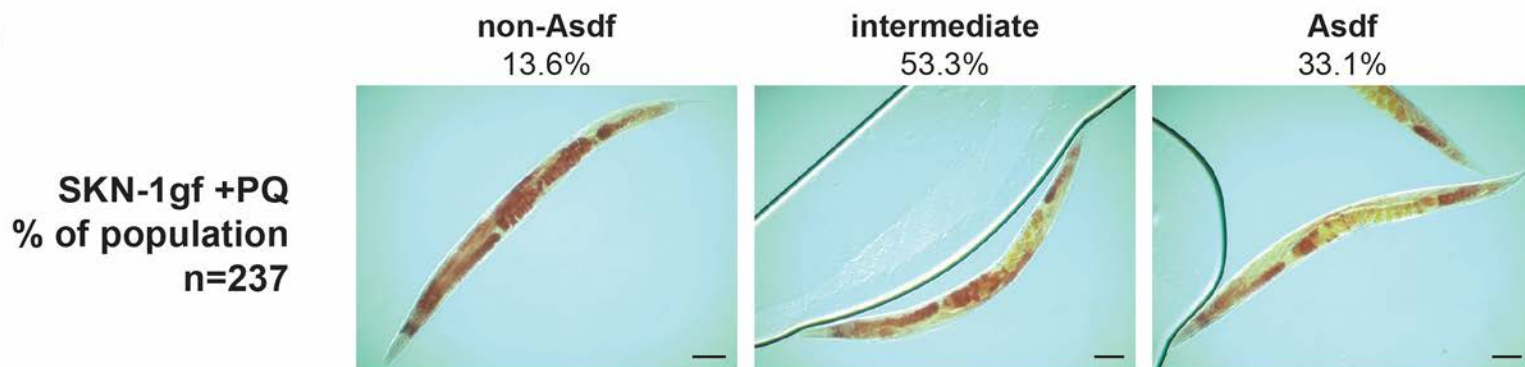**C**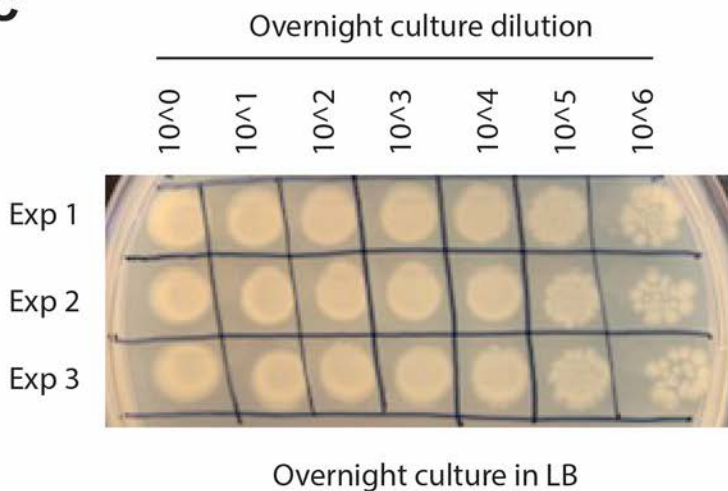**D**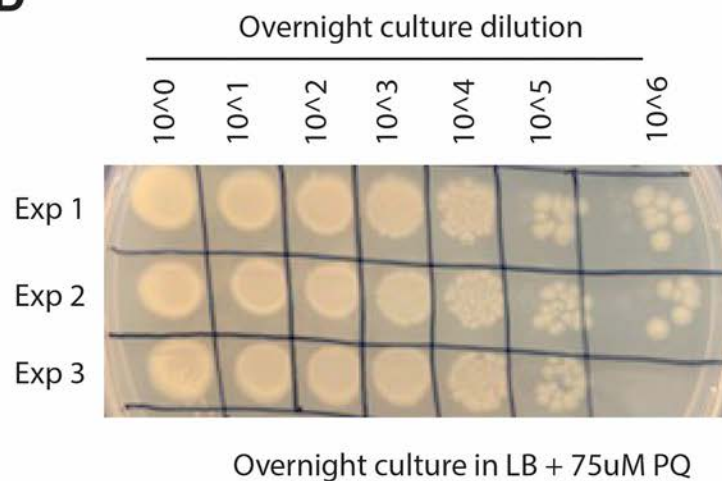**Figure S5**

A

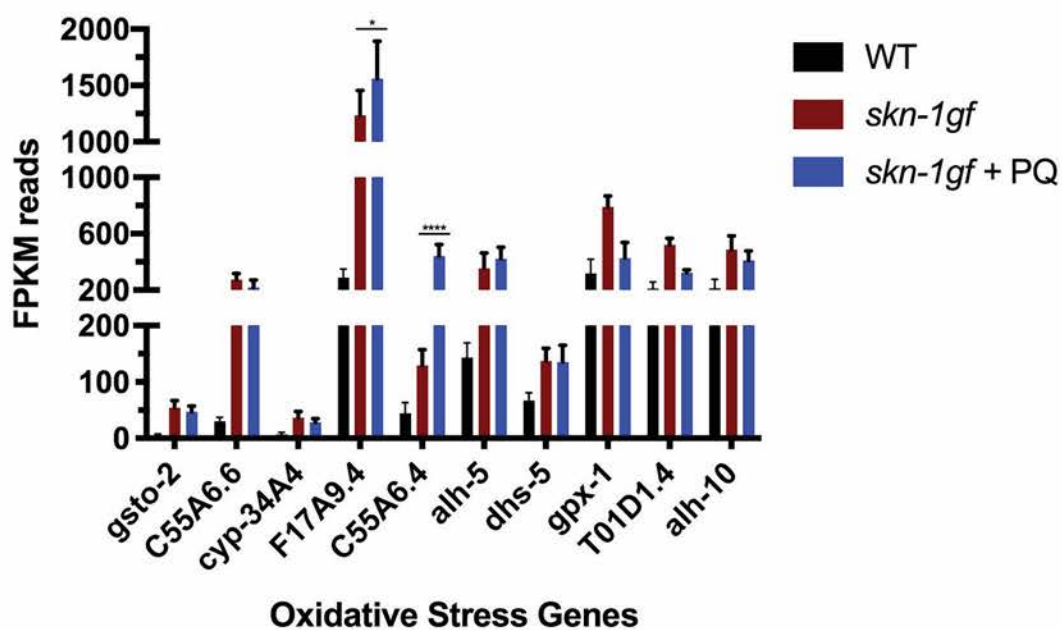

B

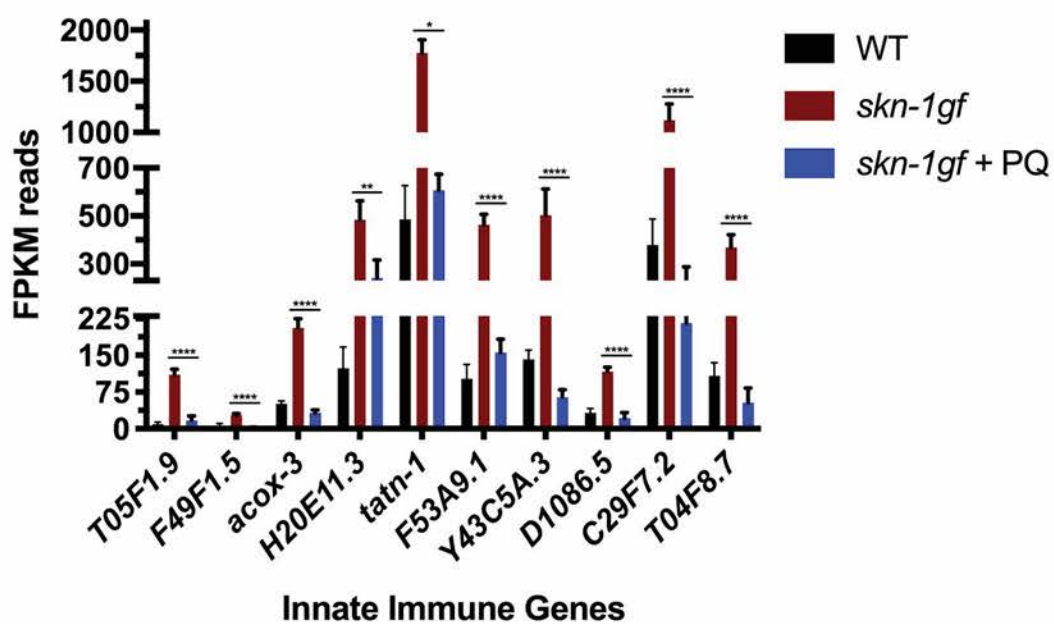

C

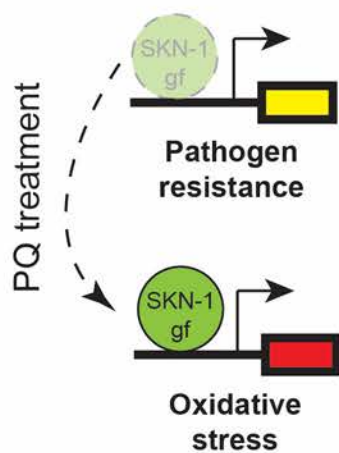

Figure S6



**A**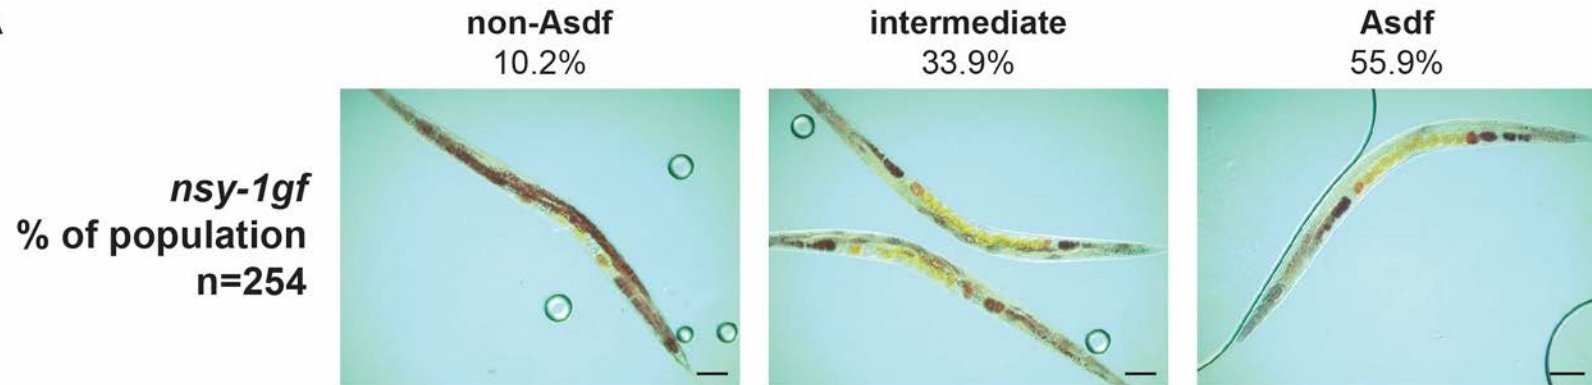**B**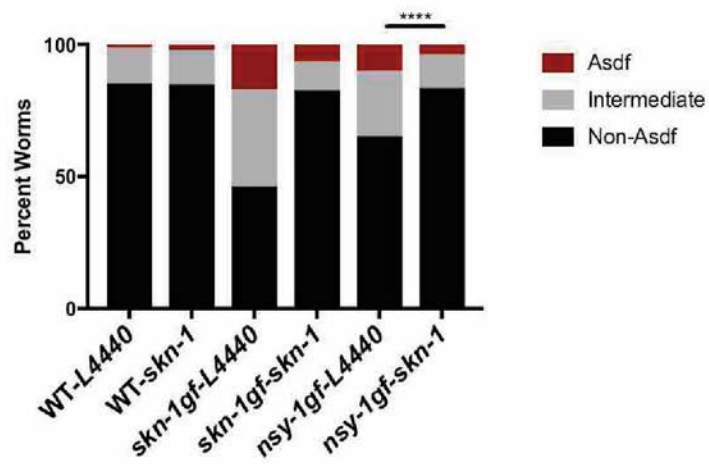

Figure S7

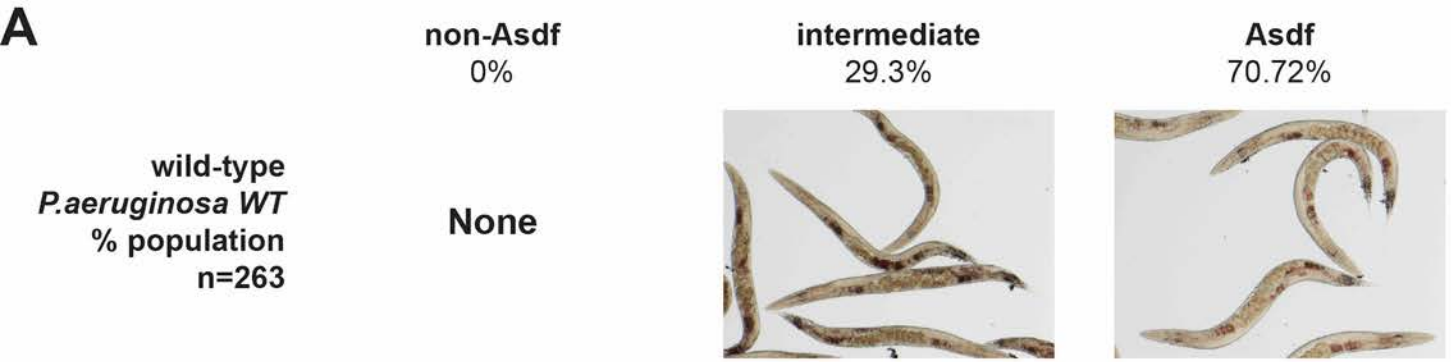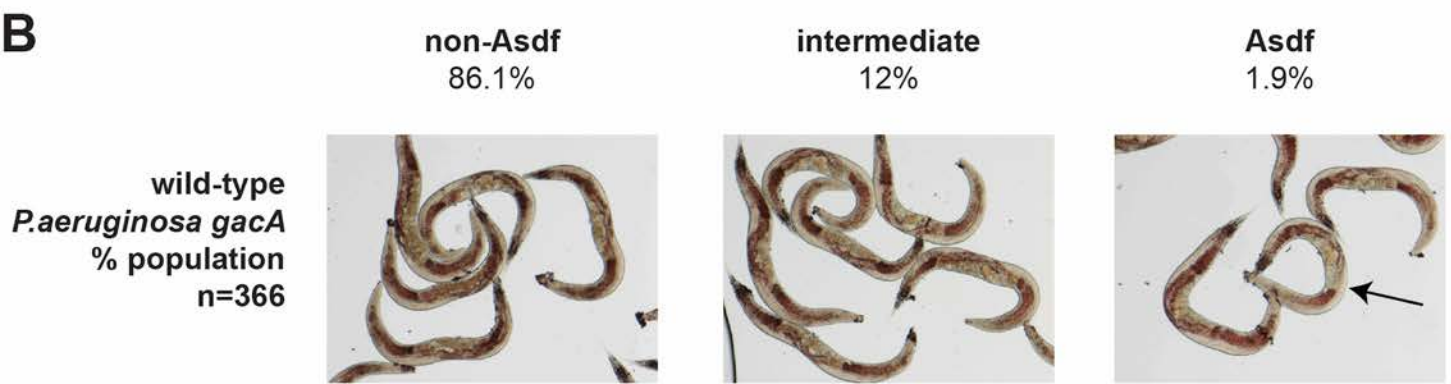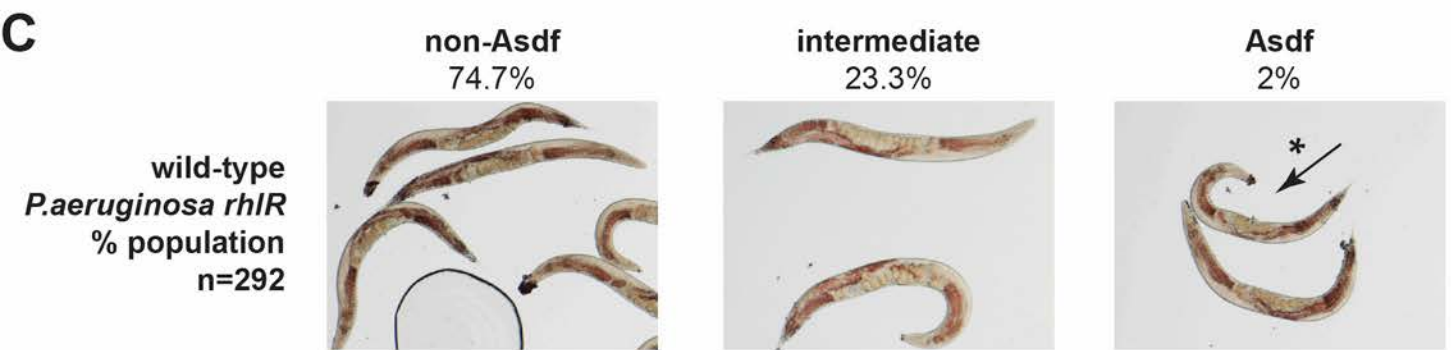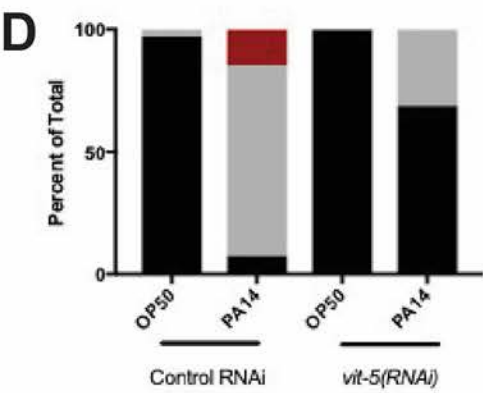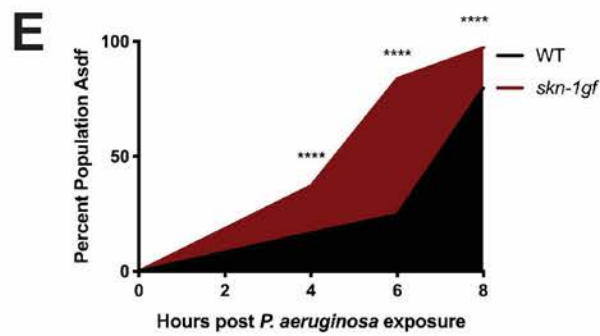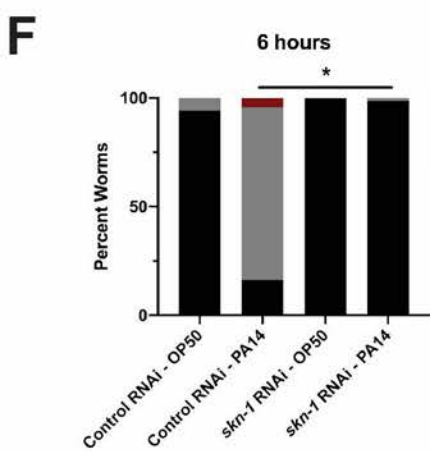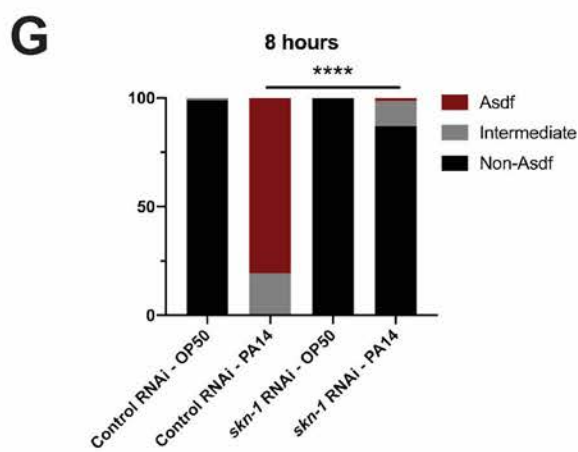

Figure S8

**A****Fast Kill  
Young Adult**

YA

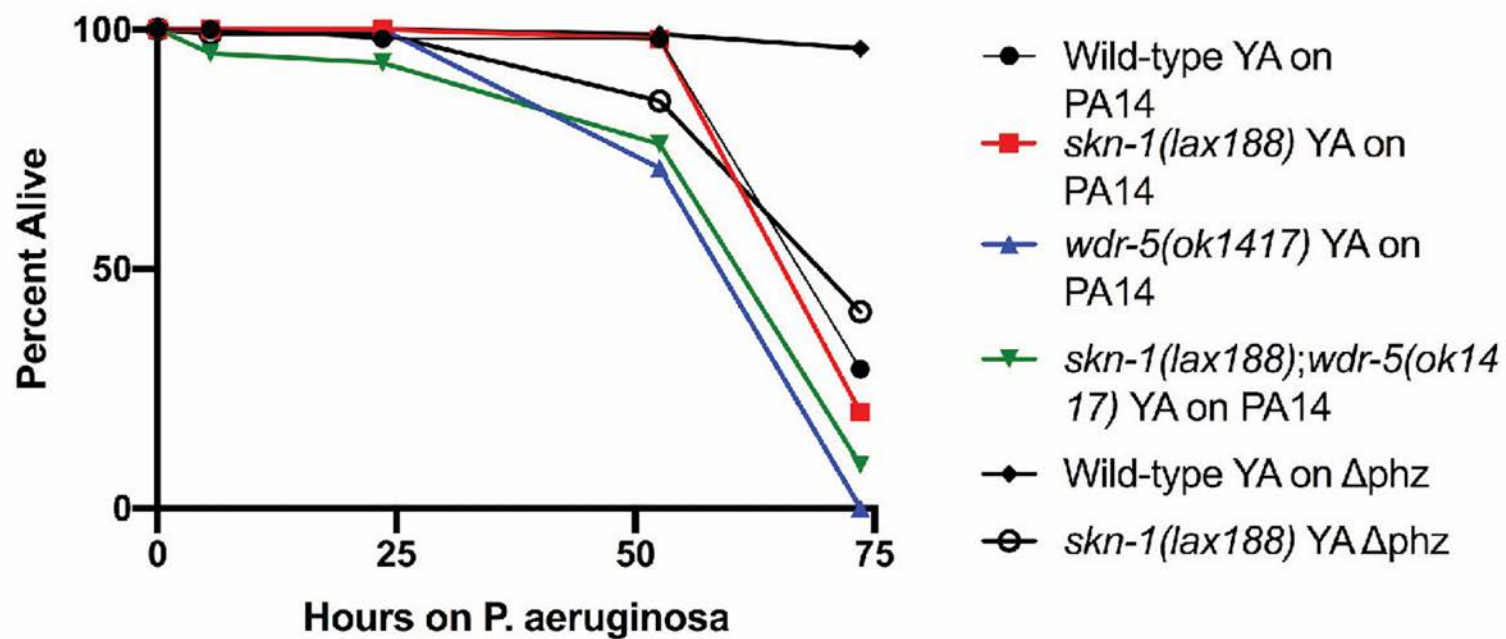**Figure S9**

**A****Biosynthesis Genes**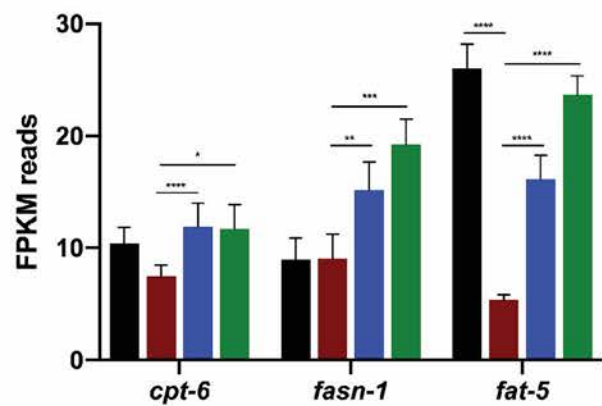**B****Lipid Metabolism Genes**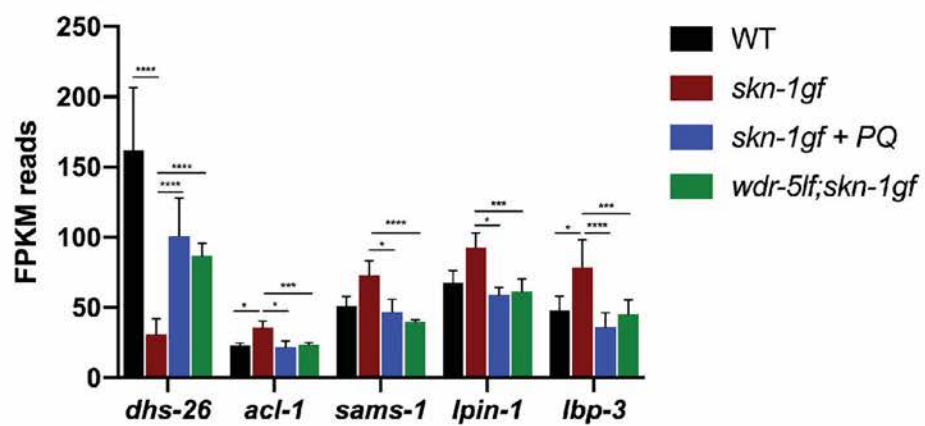**C**

DIC

Nile Red

DIC

Nile Red

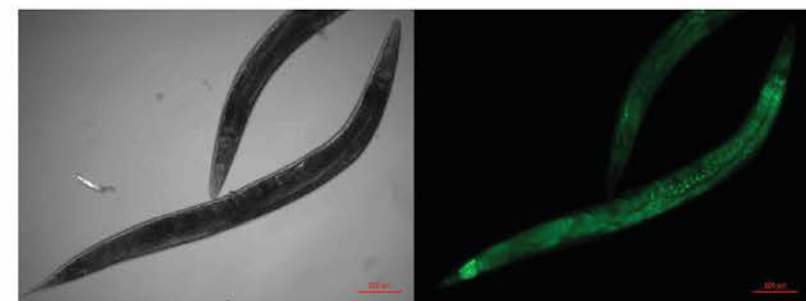

Wild type

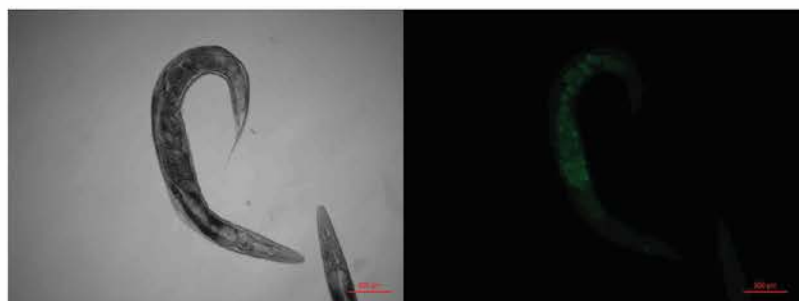*skn-1gf(lax188)*
